# Supplementary material
Source: Springer Nature journal article supplement (https://www.springermedizin.de/resource/supplementary/12885_2013_4715_MOESM3_ESM.pdf/9466926)
Supplement: MOESM3 [file 9466926]

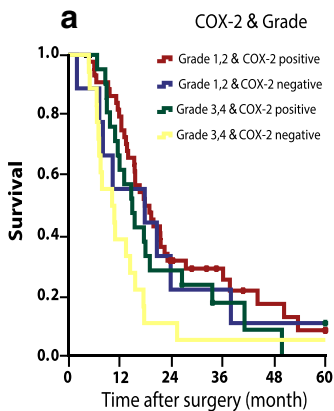

Number at risk

|                        |    |    |    |   |   |   |
|------------------------|----|----|----|---|---|---|
| Grade 1,2 & COX-2 pos. | 44 | 35 | 13 | 8 | 4 | 2 |
| Grade 1,2 & COX-2 neg. | 9  | 5  | 3  | 2 | 1 | 1 |
| Grade 3,4 & COX-2 pos. | 21 | 13 | 6  | 2 | 1 | 0 |
| Grade 3,4 & COX-2 neg. | 18 | 7  | 2  | 1 | 1 | 1 |

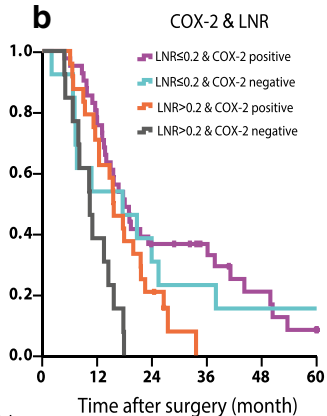

Number at risk

|                        |    |    |    |    |   |   |
|------------------------|----|----|----|----|---|---|
| LNR ≤ 0.2 & COX-2 pos. | 41 | 31 | 14 | 10 | 5 | 2 |
| LNR ≤ 0.2 & COX-2 neg. | 13 | 7  | 4  | 3  | 2 | 2 |
| LNR > 0.2 & COX-2 pos. | 24 | 17 | 5  | 0  | 0 | 0 |
| LNR > 0.2 & COX-2 neg. | 13 | 5  | 0  | 0  | 0 | 0 |
